# Supplementary material
Source: MDPI journal article supplement (https://www.mdpi.com/2076-3417/9/18/3782)
Supplement: s1 [file s1]

## Concept

Relative number of hours in the year (in %) by different temperature intervals: 4–8°C (nh4-8.shp), 8–12°C (nh8-12.shp), 12–16°C (nh12-16.shp), 16–20°C (nh16-20.shp), 20–24°C (nh20-24.shp), 24–28°C (nh24-28.shp), 28–32°C (nh28-32.shp), 32–36°C (nh32-36.shp), over mainland Portugal and for the period of 2000-2018

Data creation: July/2019

Spatial resolution: 1m

Number of shapefiles 8

Geographic Coordinate system WGS 1984

## Attributes (identification and description)

ID – Unique identification of each object.

Label – Identification of each class.
